# Supplementary material for: Mechanism unravelling for ultrafast and selective 99TcO4– uptake by a radiation-resistant cationic covalent organic framework: a combined radiological experiment and molecular dynamics simulation study
Source: PubMed Central journal article supplement — Chem Sci. 2019 Feb 19;10(15):4293–305. doi: 10.1039/c9sc00172g (PMC6471554; doi:10.1039/c9sc00172g), 2019-02-19
Supplement: SC-010-C9SC00172G-s001.pdf [file SC-010-C9SC00172G-s001.pdf]

## Supplementary Information

### Mechanism Unravelling for Ultrafast and Selective $^{99}\text{TcO}_4^-$ Uptake by a Radiation-Resistant Cationic Covalent Organic Framework: A Combined Radiological Experiment and Molecular Dynamics Simulation Study

Linwei He,<sup>‡a</sup> Shengtang Liu,<sup>‡a</sup> Long Chen,<sup>‡a</sup> Xing Dai,<sup>a</sup> Jie Li,<sup>a</sup> Mingxing Zhang,<sup>a,b</sup> Fuyin Ma,<sup>a</sup> Chao Zhang,<sup>c</sup> Zaixing Yang,<sup>\*a</sup> Ruhong Zhou,<sup>a</sup> Zhifang Chai<sup>a</sup> and Shuao Wang<sup>\*a</sup>

<sup>a</sup>State Key Laboratory of Radiation Medicine and Protection, School of Radiation Medicine and Protection, Collaborative Innovation Center of Radiological Medicine of Jiangsu Higher Education Institutions, Soochow University, Suzhou 215123, China.

<sup>b</sup>Shanghai Institute of Applied Physics, Chinese Academy of Sciences, No. 2019 Jialuo Rd., Jiading Dist., Shanghai, 201800, China

<sup>c</sup>School of Materials Science and Engineering, Anhui University of Science and Technology, Huainan 232001, China

<sup>‡</sup>These authors contribute equally.

\*shuawang@suda.edu.cn (Shuao Wang); zxyang@suda.edu.cn (Zaixing Yang)

## Sorption data fitting by isotherm models

The Langmuir model supposes that the sorption of metal ions presents on a homogenous surface by monolayer sorption. There is no interaction between adsorbed ions. The binding sites are homogeneous and the metal ions have equivalent sorption energies. The linear equation of the Langmuir isotherm model is described and expressed as followed<sup>24</sup>:

$$\frac{c_e}{q_e} = \frac{1}{q_m k_L} + \frac{c_e}{q_m}$$

where  $q_m$  is the maximum sorption capacity of the sorbents corresponding to complete monolayer coverage (mg/g) and  $k_L$  is a constant indirectly related to sorption capacity and energy of sorption (L/mg), which characterizes the affinity of the adsorbate with the adsorbent. The linearized plot was obtained when we plotted  $C_e/q_e$  against  $C_e$  and  $q_m$  and  $k_L$  could be calculated from the slope and intercept.

The Freundlich equation is an empirical equation based on sorption on a heterogeneous surface. The isotherm assumes that adsorbent surface sites have a spectrum of different binding energies. The linear equation can be described and expressed by:

$$\ln q_e = \ln k_F + \frac{1}{n} \ln c_e$$

where  $k_F$  and  $n$  are the Freundlich constants related to the sorption capacity and the sorption intensity, respectively.

The distribution coefficient  $K_d$  was calculated using the equation of  $K_d = [(c_0 - c_e)V/c_e]/m$ , where  $c_0$  and  $c_e$  are the initial and equilibrium concentration of  $\text{ReO}_4^-$  (mg/L),  $V$  is the volume of the solution (L),  $m$  is the mass of SCU-COF-1 sample (mg).

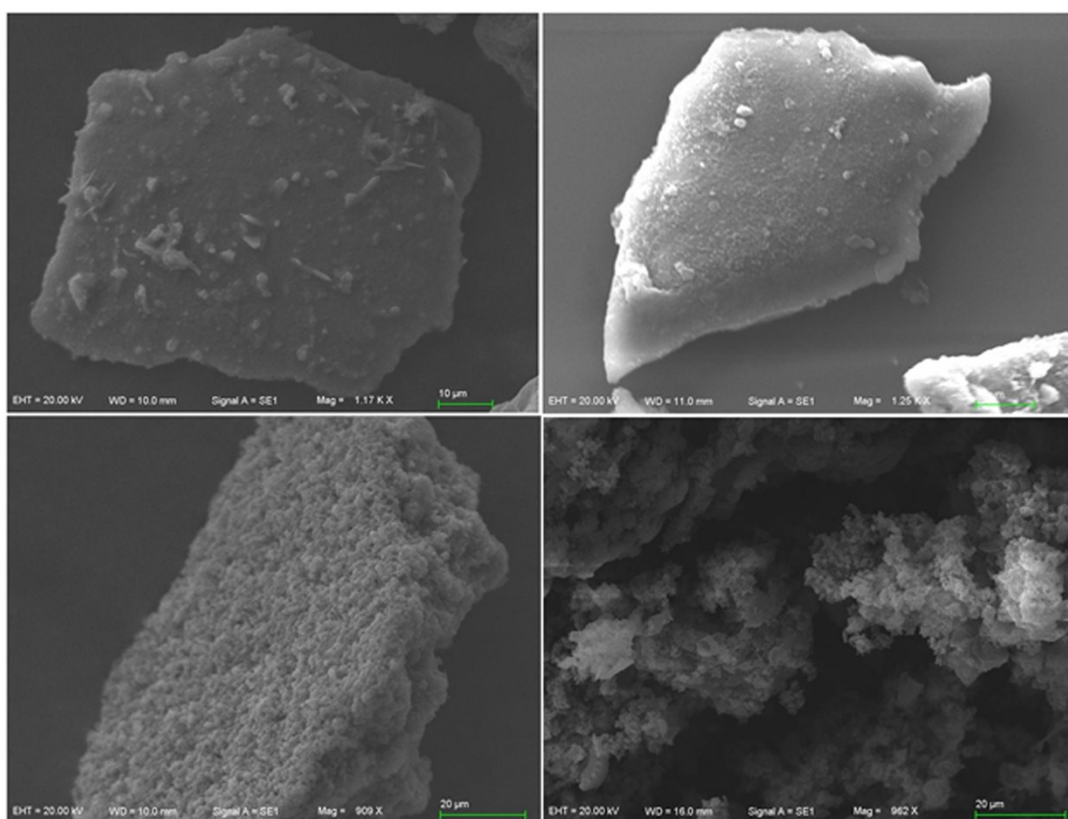

**Figure S1.** SEM images of SCU-COF-1.

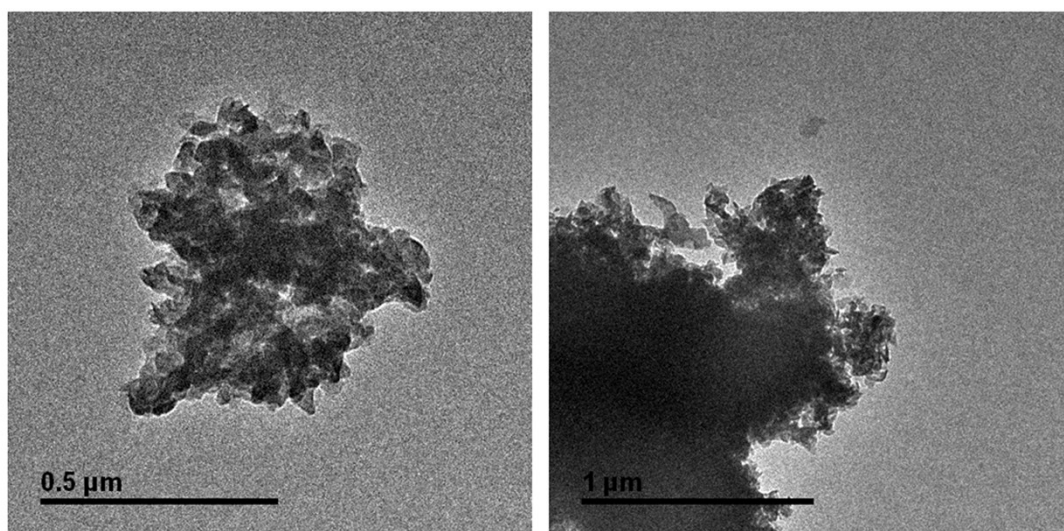

**Figure S2.** TEM images of SCU-COF-1.

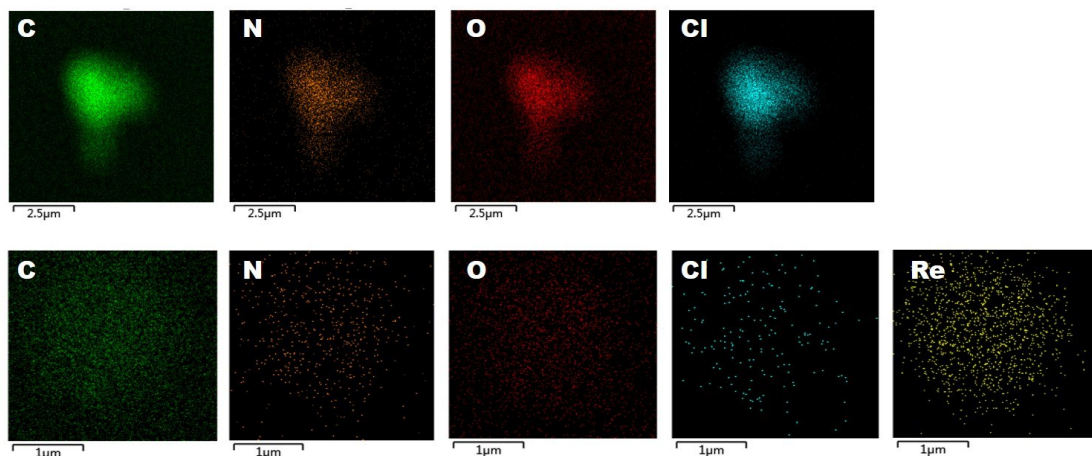

**Figure S3.** EDS mapping images of SCU-COF-1 before and after sorption with  $\text{ReO}_4^-$ .

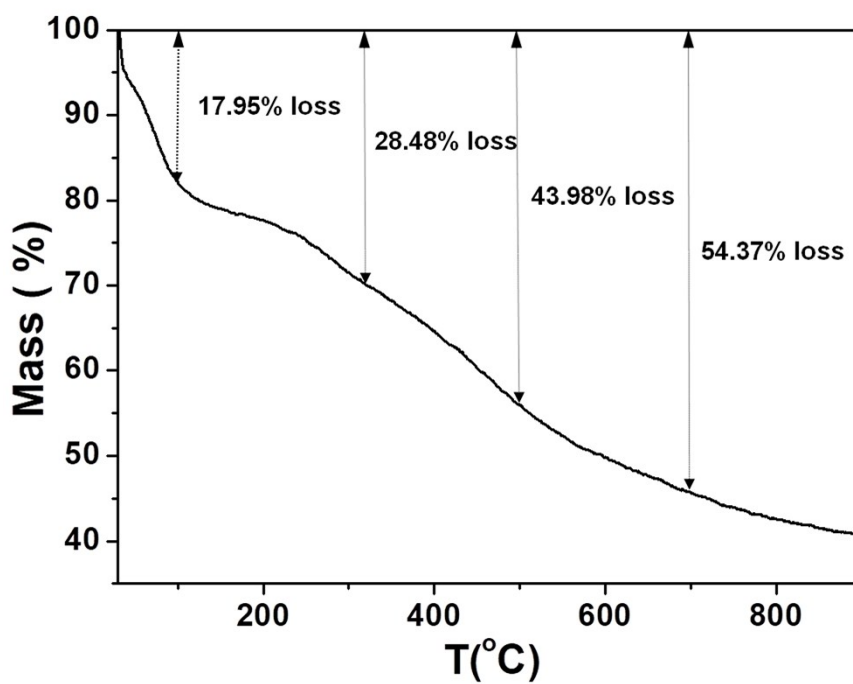

**Figure S4.** TGA curve of COF SCU-COF-1 under  $\text{N}_2$  atmosphere.

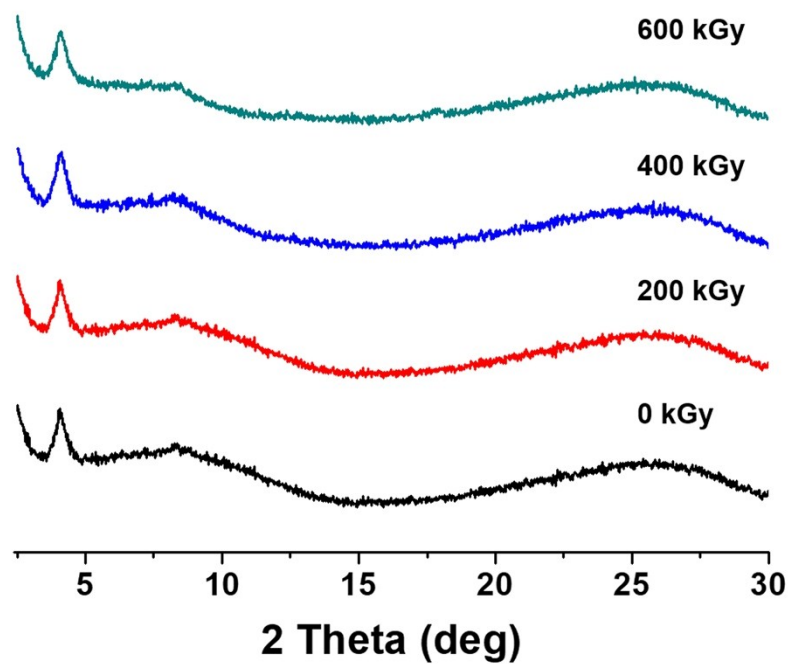

**Figure S5.** PXRD patterns of SCU-COF-1 after irradiated by various doses of  $^{60}\text{Co}$   $\gamma$ -irradiation.

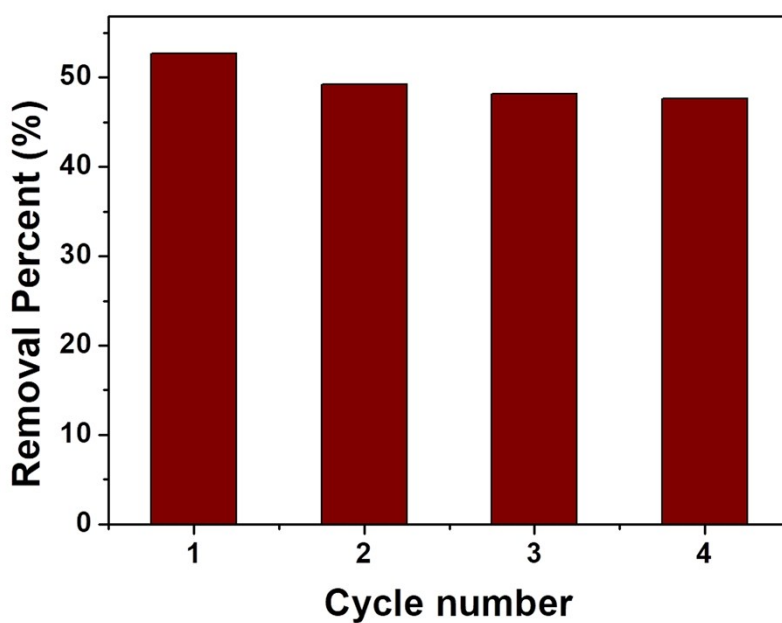

**Figure S6.** Reversibility of SCU-COF-1 for removing  $\text{ReO}_4^-$  in 3 M  $\text{HNO}_3$  ( $c_0 = 253$  ppm, solid-liquid ratio = 40 : 1).

**Scheme S1.** Synthetic procedures of Zincke salt [4,4'-bipyridine]-1,1'-dium dichloride (BDB) and aminated viologen (Viologen-NH<sub>2</sub>).

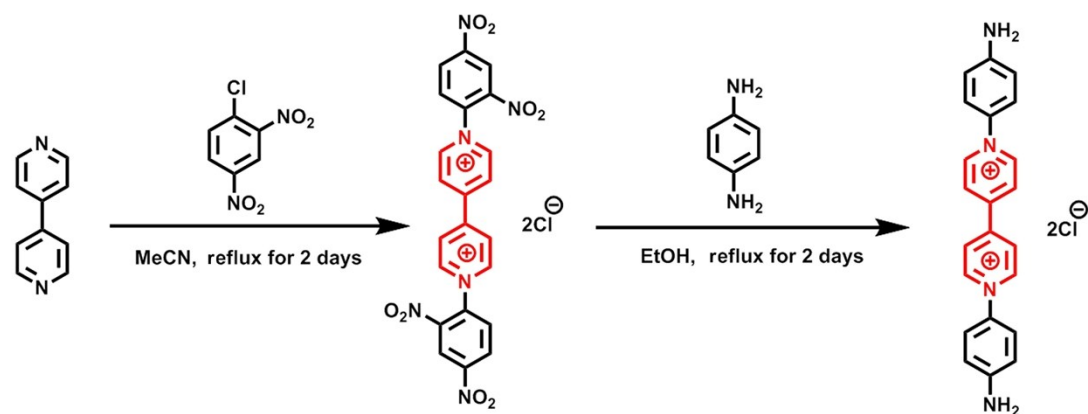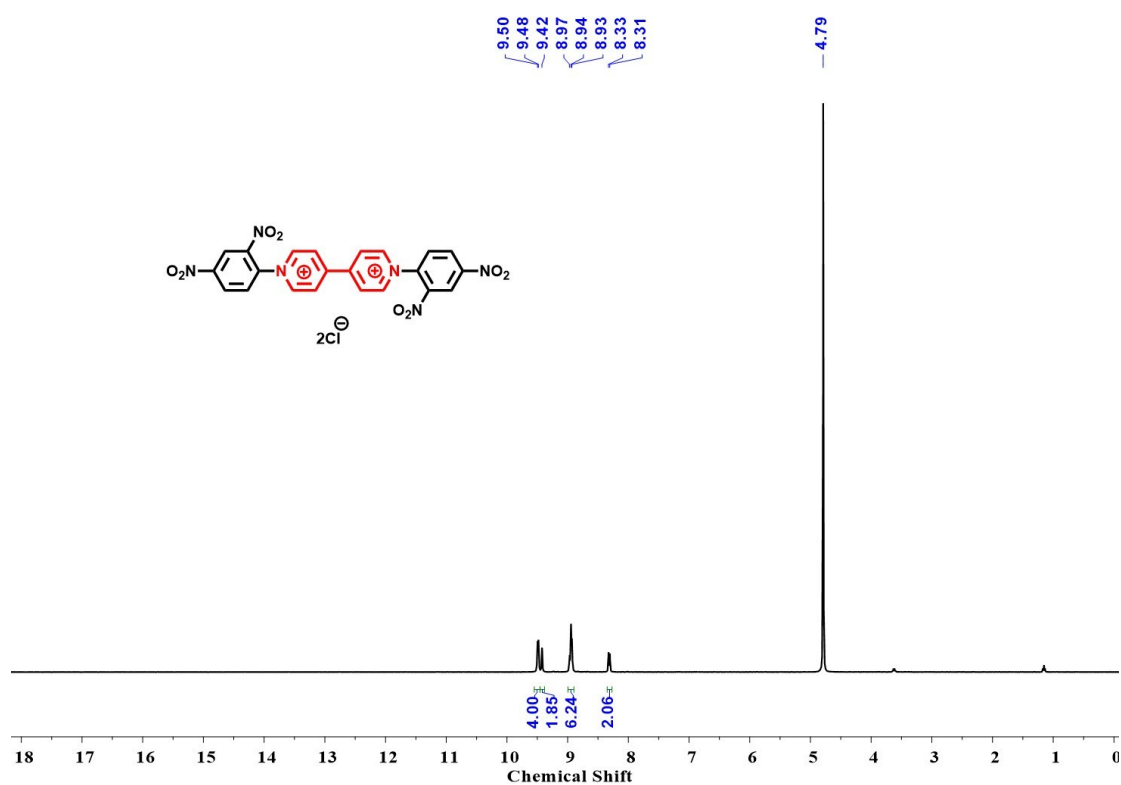

**Figure S7.** <sup>1</sup>H NMR spectrum of ionic compound BDB salt in D<sub>2</sub>O.

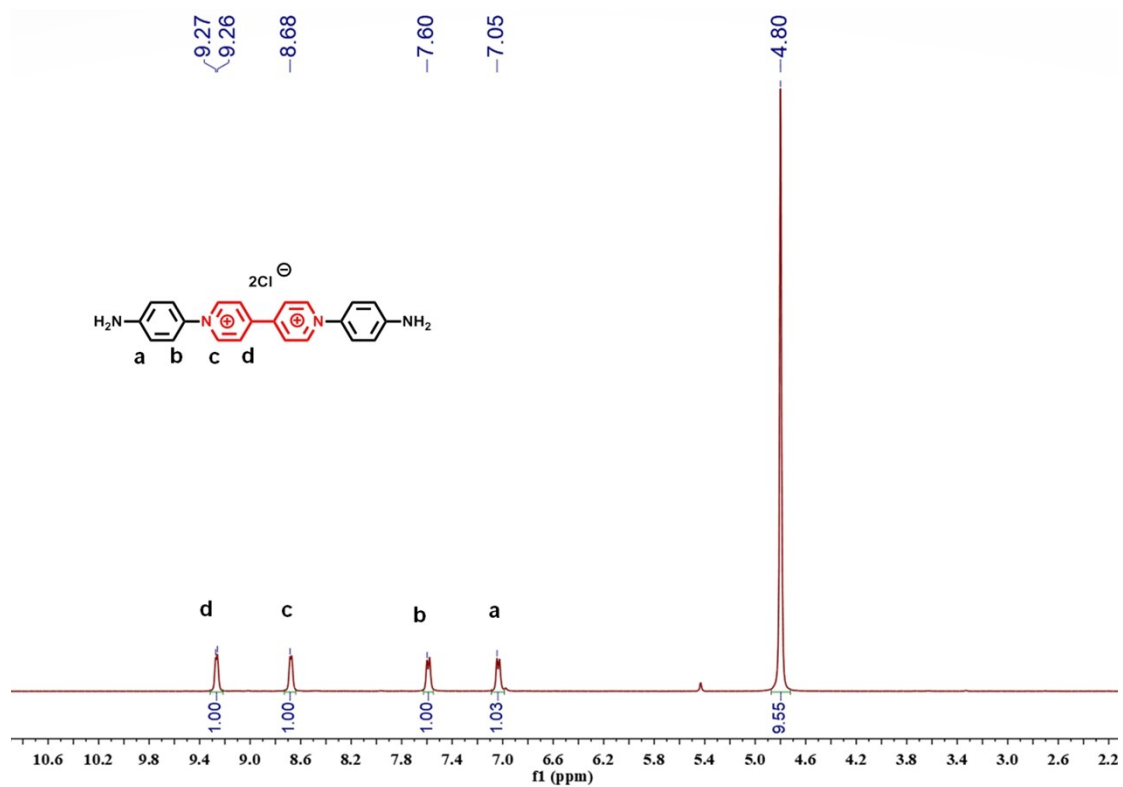

**Figure S8.** <sup>1</sup>H NMR spectrum of ionic compound Viologen-NH<sub>2</sub> in D<sub>2</sub>O.

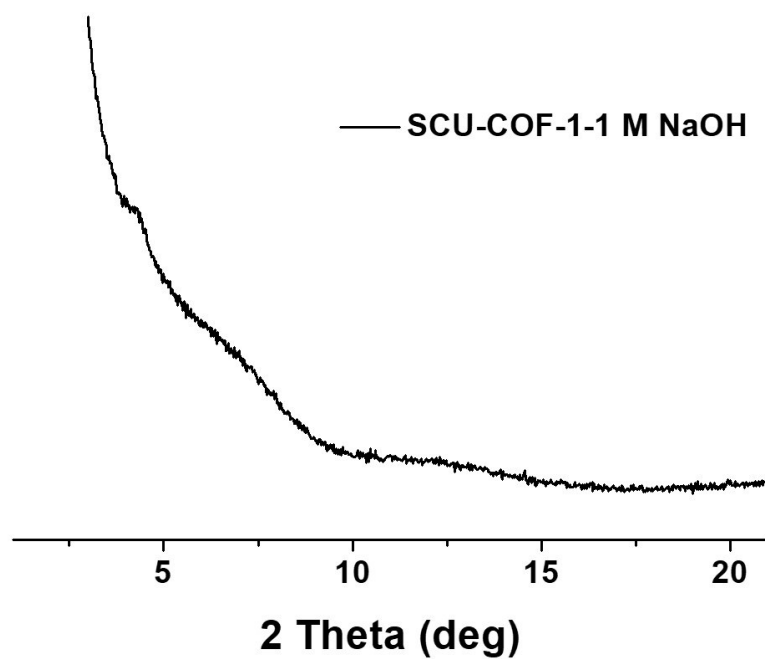

**Figure S9.** PXRD patterns of SCU-COF-1 after being immersed in 1 M NaOH.

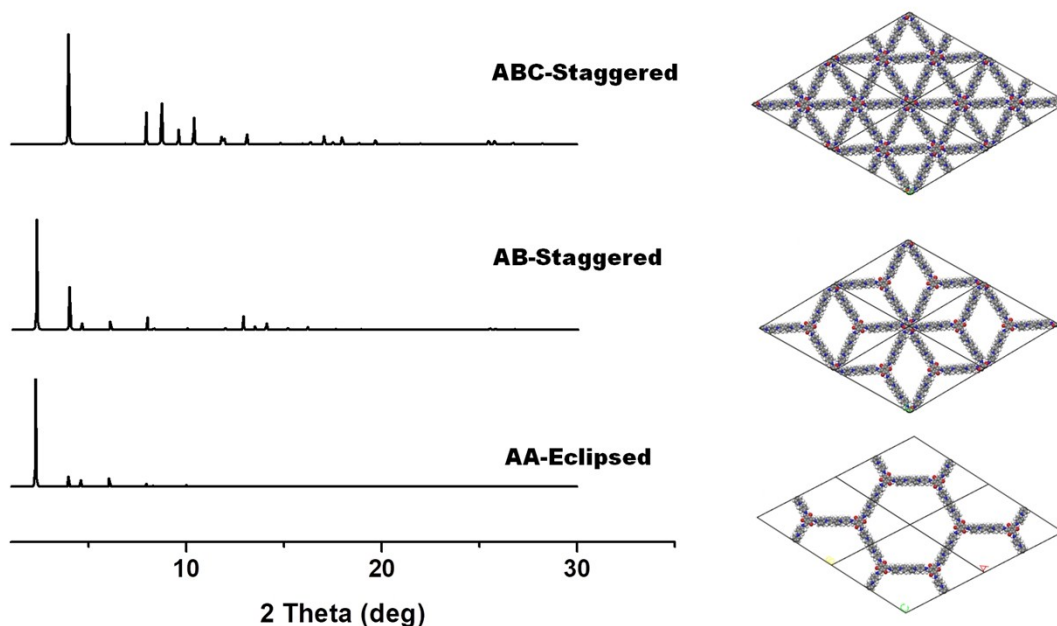

**Figure S10.** Unit cells for AA-eclipsed, AB-staggered and ABC-staggered stacking model (right) and the corresponding simulated PXRD patterns (left).

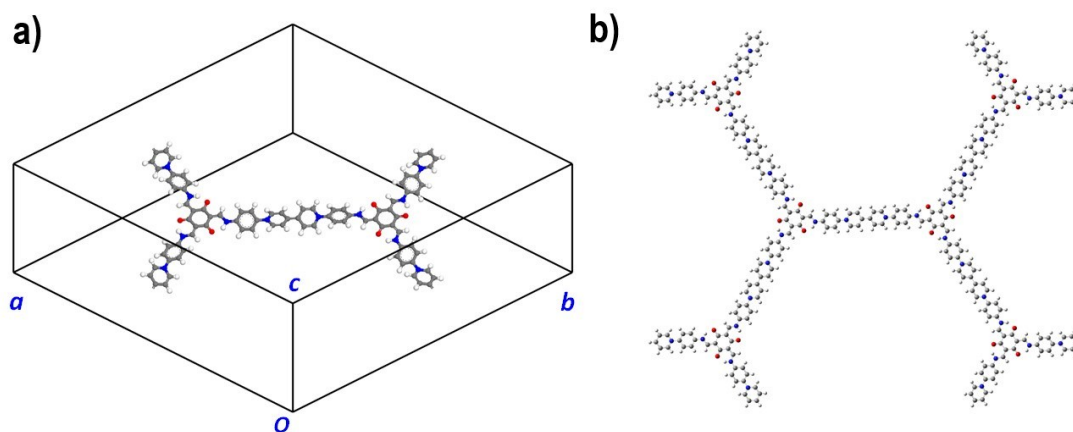

**Figure S11.** (a) The unit cell of the SCU-COF-1 single layer. (b) The cluster model of the SCU-COF-1 single layer. The dangling carbons in (b) were saturated by H atoms. In both (a) and (b), the grey, red, blue and white balls represent the C, O, N and H atoms.

Geometry and lattice parameters of the unit cell of the SCU-COF-1 single layer, as shown in **Figure S11a**, were optimized at PBE/DNP<sup>1</sup> level using



Dmol3 program.<sup>2</sup> The symmetry was restrained to  $P6$  ( $a = b$ ,  $\alpha = \beta = 90^\circ$ ,  $\gamma = 120^\circ$ ) and the  $c$  value was fixed to 30 Å during optimizations. A  $2 \times 2 \times 1$  k-point set with a global cutoff of 3.7 Å were used. The calculated result showed a balanced lattice parameter of  $a = b = 44.5$  Å.

Based on the optimized periodic unit cell, we constructed a large cluster model, as shown in **Figure S11b**, for calculating the atomic charges. Single point energy calculation were performed for this cluster model at HF/6-31G\*<sup>3</sup> level using Gaussian 09 program.<sup>4</sup> The atomic charges fit to the electrostatic potential (ESP) according to the MK scheme were then deduced. The ESP charges distributed on the center region were selected for the following classical molecular dynamics simulations.

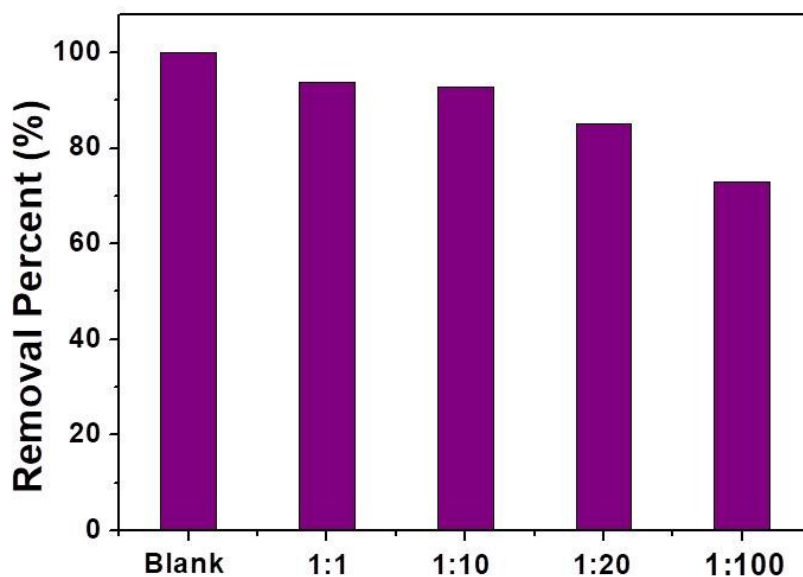

**Figure S12.** Effect of excessive  $\text{SO}_4^{2-}$  on the removal percentage of  $\text{ReO}_4^-$  (molar ratio = 1 : 1, 1 : 10, 1 : 20, 1 : 100, initial concentration of  $\text{ReO}_4^-$  = 15 ppm).

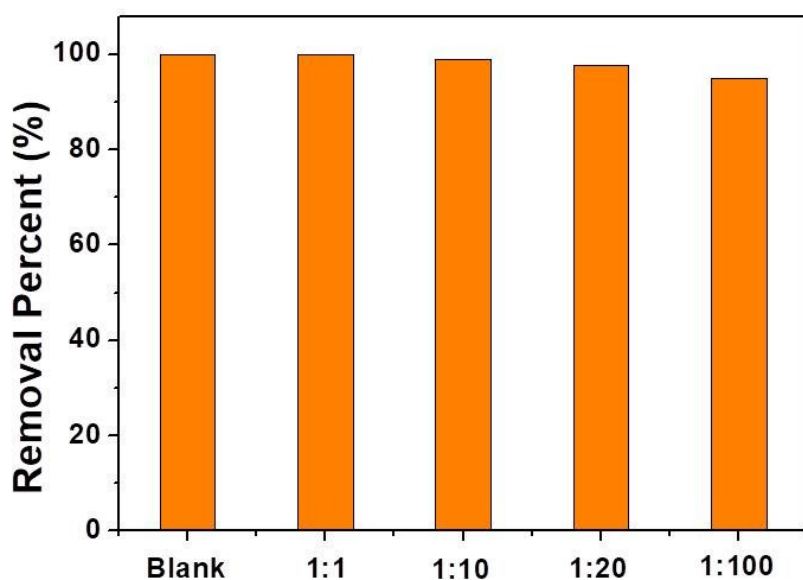

**Figure S13.** Effect of excessive  $\text{PO}_4^{3-}$  on the removal percentage of  $\text{ReO}_4^-$  (molar ratio = 1 : 1, 1 : 10, 1 : 20, 1 : 100, initial concentration of  $\text{ReO}_4^-$  = 15 ppm).

**Table S1.** Comparison of equilibrium time of SCU-COF-1 with other reported materials.

| Sorbents                              | Experimental conditions                                                                 | Equilibrium time | Ref.             |
|---------------------------------------|-----------------------------------------------------------------------------------------|------------------|------------------|
| SLUG-21                               | $[\text{Re}]_0 = 1.26 \times 10^{-3}$ mol/L; half molar ratio                           | >24 h            | 5                |
| Calcined LDH                          | $[\text{Re}]_0 = 1.26 \times 10^{-3}$ mol/L; half molar ratio                           | >24 h            | 5                |
| UiO-66-NH <sub>3</sub> <sup>+</sup>   | molar ratio = 1:2 (ReO <sub>4</sub> <sup>-</sup> :UiO-66-NH <sub>3</sub> <sup>+</sup> ) | >24 h            | 6                |
| Acidosasa edulis shoot shell bio-char | T = 298 K; pH 1; 3 g/L; $[\text{Re(VII)}]_0 = 20$ mg/L                                  | 350 min          | 7                |
| 4-ATR resin                           | Resin = 10.0 mg; $[\text{Re(VII)}]_0 = 7.2$ mg/50.0 mL; pH = 2.6; 100 rpm.              | 8 h              | 8                |
| SCU-100                               | $[\text{Re(VII)}]_0 = 28$ mg/L; pH = 7; 1 g/L; stirring                                 | 30 min           | 9                |
| SCU-101                               | $[\text{Re(VII)}]_0 = 28$ mg/L; pH = 7; 1 g/L; stirring                                 | 10 min           | 19               |
| SBN                                   | $[\text{Re(VII)}]_0 = 28$ mg/L; pH = 7; 1 g/L; stirring                                 | 10 min           | 12               |
| Purolite A532E                        | $[\text{Re(VII)}]_0 = 28$ mg/L; pH = 7; 1 g/L; stirring                                 | 150 min          | 10               |
| Purolite A530E                        | $[\text{Re(VII)}]_0 = 28$ mg/L; pH = 7; 1 g/L; stirring                                 | 150 min          | 10               |
| Compound-1                            | $[\text{Re(VII)}]_0 = 28$ mg/L; pH = 7; 1 g/L; shaking                                  | 20 min           | 21               |
| <b>SCU-COF-1</b>                      | <b><math>[\text{Re(VII)}]_0 = 28</math> mg/L; pH = 7; 1 g/L; shaking</b>                | <b>1 min</b>     | <b>This work</b> |

**Table S2.** Comparison of distribution coefficient ( $K_d$ , mL/g) by cationic materials.

| Sorbents                              | $K_d$                      | Ref              |
|---------------------------------------|----------------------------|------------------|
| Mg-Al-LDH                             | 262                        | 9                |
| NDTB-1                                | 652                        | 9                |
| Y <sub>2</sub> (OH) <sub>5</sub> Cl   | 112                        | 9                |
| Yb <sub>3</sub> O(OH) <sub>6</sub> Cl | 120                        | 9                |
| PAF-1-F                               | 2.55×10 <sup>4</sup>       | 20               |
| SCU-6                                 | 3.0×10 <sup>3</sup>        | 23               |
| SCU-7                                 | 63                         | 23               |
| SCU-100                               | 3.3×10 <sup>5</sup>        | 10               |
| SCU-101                               | 7.5×10 <sup>5</sup>        | 19               |
| <b>SCU-COF-1</b>                      | <b>3.89×10<sup>5</sup></b> | <b>This work</b> |

**Table S3.** Fitting results of SCU-COF-1 based on the Langmuir models.

| Sample    | Langmuir model              |                             |       |
|-----------|-----------------------------|-----------------------------|-------|
|           | $q_m$ (mg g <sup>-1</sup> ) | $K_L$ (L mg <sup>-1</sup> ) | $R^2$ |
| SCU-COF-1 | 367.65                      | 0.14                        | 0.98  |

**Table S4.** Composition of Hanford LAW melter off-gas scrubber solution.

| Anion                         | Concentration, mol/L  | Anion : TcO <sub>4</sub> <sup>-</sup> molar ratio |
|-------------------------------|-----------------------|---------------------------------------------------|
| TcO <sub>4</sub> <sup>-</sup> | $1.94 \times 10^{-4}$ | 1.0                                               |
| NO <sub>3</sub> <sup>-</sup>  | $6.07 \times 10^{-2}$ | 314                                               |
| Cl <sup>-</sup>               | $6.39 \times 10^{-2}$ | 330                                               |
| NO <sub>2</sub> <sup>-</sup>  | $1.69 \times 10^{-1}$ | 873                                               |
| SO <sub>4</sub> <sup>2-</sup> | $6.64 \times 10^{-6}$ | 0.0343                                            |
| CO <sub>3</sub> <sup>2-</sup> | $4.30 \times 10^{-5}$ | 0.222                                             |

**Table S5.** Results of  $\text{ReO}_4^-$  and  $\text{TcO}_4^-$  sorption by SCU-COF-1 from simulated Hanford waste.

| Simulated wastes | Anions           | Solid-to-liquid ratio<br>(g L <sup>-1</sup> ) | Anion removal<br>percentage (%) |
|------------------|------------------|-----------------------------------------------|---------------------------------|
| Hanford waste    | $\text{ReO}_4^-$ | 1:1                                           | 17.8                            |
|                  | $\text{ReO}_4^-$ | 5:1                                           | 56.3                            |
|                  | $\text{TcO}_4^-$ | 1:1                                           | 20.9                            |
|                  | $\text{TcO}_4^-$ | 5:1                                           | 62.8                            |

**Table S6.** Results of  $\text{ReO}_4^-$  desorption from sorbed SCU-COF-1 at 300 K.

| Desorption<br>temperature | Concentrations of desorption solution<br>(NaCl, mol/L) | Desorption<br>percentage (%) |
|---------------------------|--------------------------------------------------------|------------------------------|
| 25 °C                     | 1                                                      | 79.24                        |
|                           | 2                                                      | 87.65                        |
|                           | 3                                                      | 95.03                        |

**Table S7.** Comparison of the maximum  $\text{ReO}_4^-$  sorption capacities.

| Materials           | Sorbents                                    | Experimental conditions                      | Capacity (mg/g) | Ref. |
|---------------------|---------------------------------------------|----------------------------------------------|-----------------|------|
| Inorganic Materials | Biochar                                     | T = 298 K; 12 h; 3 g/L                       | 46.5            | 11   |
|                     | $\text{Yb}_3\text{O}(\text{OH})_6\text{Cl}$ | Ambient temperature; pH = 7.0 ± 0.1; 0.5 g/L | 48.6            | 10   |
|                     | NDTB-1                                      | Ambient temperature; pH = 7.0 ± 0.1; 0.5 g/L | 49.4            | 10   |
|                     | LDHs                                        | Ambient temperature; pH = 7.0 ± 0.1; 0.5 g/L | <b>130.2</b>    | 10   |
| Composites          | $\text{ZrO}_2@\text{rGO}$                   | T = 303 K; 24 h                              | 43.55           | 13   |
|                     | NZVI/rGOs                                   | 0.1 g/L; pH 5                                | 85.77           | 14   |
|                     | GO-DEA-DIBA                                 | 303 K; 2 g/L; 48 h                           | <b>140.82</b>   | 15   |
|                     | PS-g-4VP-IE                                 | Ambient temperature; 2 h                     | 252             | 16   |
|                     | D318 resin                                  | T = 298 K; pH 5.2; 1 g/L                     | 351             | 17   |
|                     | 4-ATR resin                                 | T = 298 K; 8 h; pH 2.6; 10 h                 | 354             | 8    |
|                     | $\text{R}_2\text{SO}_4$ resin               | Ambient temperature; 1.3 g/L; pH 6.25; 4 h   | 462             | 18   |
|                     | Purolite A532E                              | Ambient temperature; pH = 7.0 ± 0.1; 0.5 g/L | 446             | 12   |
|                     | Purolite A530E                              | Ambient temperature; pH = 7.0±0.1; 0.5 g/L   | <b>706</b>      | 9    |
|                     | MOFs                                        | UiO-66- $\text{NH}_3^+$                      | 24 h            | 159  |
| SCU-101             |                                             | Ambient temperature; pH = 7.0 ± 0.1; 1 g/L   | 217             | 19   |
| SCU-100             |                                             | Ambient temperature; pH = 7.0 ± 0.1; 1 g/L   | 541             | 9    |
| SLUG-21             |                                             | Ambient temperature; 48 h; 1.6 g/L           | 602             | 5    |
| SBN                 |                                             | Ambient temperature; pH = 7.0 ± 0.1; 0.5 g/L | <b>786</b>      | 10   |

|      |            |                                                    |       |           |
|------|------------|----------------------------------------------------|-------|-----------|
|      | PAF-1-F    | Molar ratio, ReO <sub>4</sub> : PAF-1-F =1:2; 24 h | 420   | 20        |
| POPs | Compuond-1 | Ambient temperature; 24 h; 2 g/L                   | 517   | 21        |
|      | SCU-CPN-1  | Ambient temperature; 12 h; 1 g/L                   | 999   | 22        |
| COFs | SCU-COF-1  | Ambient temperature; 12 h; 1 g/L                   | 367   | This work |
|      |            | 373 K; 14 h; 1g/L                                  | 702.4 |           |



**Table S8.** Fractional atomic coordinates for the unit cell of SCU-COF-1 (AA-Eclipsed).

| SCU-COF-1 (AA-Eclipsed) |         |         |         |
|-------------------------|---------|---------|---------|
| <i>P6</i>               |         |         |         |
| N1                      | 0.45929 | 0.90830 | 0.47138 |
| C2                      | 0.44126 | 0.92434 | 0.36033 |
| C3                      | 0.45647 | 0.95995 | 0.36335 |
| C4                      | 0.49161 | 0.98099 | 0.46680 |
| C5                      | 0.50983 | 0.96386 | 0.56987 |
| C6                      | 0.49333 | 0.92812 | 0.57730 |
| C7                      | 0.44252 | 0.87109 | 0.47796 |
| C8                      | 0.40772 | 0.85165 | 0.59424 |
| C9                      | 0.39126 | 0.81575 | 0.59879 |
| C10                     | 0.40936 | 0.79870 | 0.48691 |
| C11                     | 0.44450 | 0.81855 | 0.37717 |
| C12                     | 0.46098 | 0.85445 | 0.37154 |
| N13                     | 0.39405 | 0.76282 | 0.48242 |
| C14                     | 0.35997 | 0.73917 | 0.49587 |
| C15                     | 0.34758 | 0.70395 | 0.49755 |
| C16                     | 0.37136 | 0.69024 | 0.49402 |
| O17                     | 0.30640 | 0.59625 | 0.48390 |
| H18                     | 0.34120 | 0.74833 | 0.49702 |
| H19                     | 0.40903 | 0.75059 | 0.46715 |
| H20                     | 0.45848 | 0.80533 | 0.28498 |
| H21                     | 0.48759 | 0.86917 | 0.26748 |
| H22                     | 0.39386 | 0.86440 | 0.69962 |
| H23                     | 0.36474 | 0.80116 | 0.70456 |
| H24                     | 0.50595 | 0.91414 | 0.68007 |
| H25                     | 0.53669 | 0.97820 | 0.66596 |
| H26                     | 0.44098 | 0.97120 | 0.26595 |
| H27                     | 0.41493 | 0.90745 | 0.25993 |

**Table S9.** Fractional atomic coordinates for the unit cell of SCU-COF-1 (AB-Staggered).

| SCU-COF-1 (AB-Staggered) |          |          |         |
|--------------------------|----------|----------|---------|
| <i>P6</i>                |          |          |         |
| N1                       | -0.20737 | 0.57497  | 0.23569 |
| C2                       | -0.22541 | 0.59100  | 0.18017 |
| C3                       | -0.21020 | 0.62662  | 0.18167 |
| C4                       | -0.17506 | 0.64766  | 0.23340 |
| C5                       | -0.15683 | 0.63052  | 0.28493 |
| C6                       | -0.17334 | 0.59479  | 0.28865 |
| C7                       | -0.22415 | 0.53775  | 0.23898 |
| C8                       | -0.25895 | 0.51832  | 0.29712 |
| C9                       | -0.27540 | 0.48241  | 0.29940 |
| C10                      | -0.25731 | 0.46536  | 0.24345 |
| C11                      | -0.22216 | 0.48521  | 0.18859 |
| C12                      | -0.20569 | 0.52111  | 0.18577 |
| N13                      | -0.27262 | 0.42949  | 0.24121 |
| C14                      | -0.30670 | 0.40604  | 0.24794 |
| C15                      | -0.31909 | 0.37061  | 0.24877 |
| C16                      | -0.29530 | 0.35690  | 0.24701 |
| O17                      | -0.36027 | 0.26291  | 0.24195 |
| H18                      | -0.32547 | 0.41499  | 0.24851 |
| H19                      | -0.25764 | 0.41726  | 0.23358 |
| H20                      | -0.20818 | 0.47219  | 0.14249 |
| H21                      | -0.17908 | 0.53583  | 0.13374 |
| H22                      | -0.27281 | 0.53107  | 0.34981 |
| H23                      | -0.30192 | 0.46783  | 0.35228 |
| H24                      | -0.16072 | 0.58081  | 0.34004 |
| H25                      | -0.12998 | 0.64487  | 0.33298 |
| H26                      | -0.22569 | 0.63786  | 0.13298 |
| H27                      | -0.25174 | 0.57412  | 0.12997 |
| N28                      | -0.12596 | -0.24163 | 0.23569 |

|     |          |          |         |
|-----|----------|----------|---------|
| C29 | -0.10793 | -0.25767 | 0.18017 |
| C30 | -0.12313 | -0.29328 | 0.18167 |
| C31 | -0.15827 | -0.31432 | 0.23340 |
| C32 | -0.17650 | -0.29719 | 0.28493 |
| C33 | -0.16000 | -0.26146 | 0.28865 |
| C34 | -0.10919 | -0.20442 | 0.23898 |
| C35 | -0.07439 | -0.18498 | 0.29712 |
| C36 | -0.05793 | -0.14908 | 0.29940 |
| C37 | -0.07603 | -0.13203 | 0.24345 |
| C38 | -0.11117 | -0.15188 | 0.18859 |
| C39 | -0.12765 | -0.18778 | 0.18577 |
| N40 | -0.06072 | -0.09616 | 0.24121 |
| C41 | -0.02663 | -0.07271 | 0.24794 |
| C42 | -0.01424 | -0.03728 | 0.24877 |
| C43 | -0.03803 | -0.02357 | 0.24701 |
| O44 | 0.02694  | -0.07042 | 0.24195 |
| H45 | -0.00787 | -0.08166 | 0.24851 |
| H46 | -0.07570 | -0.08392 | 0.23358 |
| H47 | -0.12515 | -0.13886 | 0.14249 |
| H48 | -0.15426 | -0.0250  | 0.13374 |
| H49 | -0.06053 | -0.19774 | 0.34981 |
| H50 | -0.03141 | -0.13449 | 0.35228 |
| H51 | -0.17262 | -0.24747 | 0.34004 |
| H52 | -0.20336 | -0.31153 | 0.33298 |
| H53 | -0.10765 | -0.30453 | 0.13298 |
| H54 | -0.08159 | -0.24079 | 0.12997 |

**Table S10.** Fractional atomic coordinates for the unit cell of SCU-COF-1 (ABC-Staggered).

| SCU-COF-1 (ABC-Staggered) |         |         |          |
|---------------------------|---------|---------|----------|
| <i>R</i> 3                |         |         |          |
| N1                        | 0.45929 | 0.90830 | -0.00417 |
| C2                        | 0.44126 | 0.92434 | -0.04119 |
| C3                        | 0.45647 | 0.95995 | -0.04018 |
| C4                        | 0.49161 | 0.98099 | -0.00570 |
| C5                        | 0.50983 | 0.96386 | 0.02866  |
| C6                        | 0.49333 | 0.92812 | 0.03113  |
| C7                        | 0.44252 | 0.87109 | -0.00198 |
| C8                        | 0.40772 | 0.85165 | 0.03678  |
| C9                        | 0.39126 | 0.81575 | 0.03830  |
| C10                       | 0.40936 | 0.79870 | 0.00100  |
| C11                       | 0.44450 | 0.81855 | -0.03557 |
| C12                       | 0.46098 | 0.85445 | -0.03745 |
| N13                       | 0.39405 | 0.76282 | -0.00049 |
| C14                       | 0.35997 | 0.73917 | 0.00399  |
| C15                       | 0.34758 | 0.70395 | 0.00455  |
| C16                       | 0.39136 | 0.69024 | 0.00337  |
| O17                       | 0.30640 | 0.59625 | 0.00000  |
| H18                       | 0.34120 | 0.74833 | 0.00437  |
| H19                       | 0.40903 | 0.75059 | -0.00558 |
| H20                       | 0.45848 | 0.80533 | -0.06631 |
| H21                       | 0.48759 | 0.86917 | -0.07214 |
| H22                       | 0.39386 | 0.86440 | 0.07191  |
| H23                       | 0.36474 | 0.80116 | 0.07355  |
| H24                       | 0.50595 | 0.91414 | 0.06539  |
| H25                       | 0.53669 | 0.97820 | 0.06069  |
| H26                       | 0.44098 | 0.97120 | -0.07265 |
| H27                       | 0.41493 | 0.90745 | -0.07465 |
| N28                       | 0.54071 | 0.09170 | -0.00417 |

|     |         |         |          |
|-----|---------|---------|----------|
| C29 | 0.55874 | 0.07566 | -0.04119 |
| C30 | 0.54353 | 0.04005 | -0.04018 |
| C31 | 0.50839 | 0.01901 | -0.00570 |
| C32 | 0.49017 | 0.03614 | 0.02866  |
| C33 | 0.50667 | 0.07188 | 0.03113  |
| C34 | 0.55748 | 0.12891 | -0.00198 |
| C35 | 0.59228 | 0.14835 | 0.03678  |
| C36 | 0.60874 | 0.18425 | 0.03830  |
| C37 | 0.59064 | 0.20130 | 0.00100  |
| C38 | 0.55550 | 0.18145 | -0.03557 |
| C39 | 0.53902 | 0.14555 | -0.03745 |
| N40 | 0.60595 | 0.23718 | -0.00049 |
| C41 | 0.64003 | 0.26063 | 0.00399  |
| C42 | 0.65242 | 0.29605 | 0.00455  |
| C43 | 0.62864 | 0.30976 | 0.00337  |
| O44 | 0.69360 | 0.40375 | 0.00000  |
| H45 | 0.65880 | 0.25167 | 0.00437  |
| H46 | 0.59097 | 0.24941 | -0.00558 |
| H47 | 0.54152 | 0.19447 | -0.06631 |
| H48 | 0.51241 | 0.13083 | -0.07214 |
| H49 | 0.60614 | 0.13560 | 0.07191  |
| H50 | 0.63526 | 0.19884 | 0.07355  |
| H51 | 0.49405 | 0.08586 | 0.06539  |
| H52 | 0.46331 | 0.02180 | 0.06069  |
| H53 | 0.55902 | 0.02880 | -0.07265 |
| H54 | 0.58507 | 0.09255 | -0.07465 |

## References

- (1). J. P. Perdew, K. Burke and M. Ernzerhof, *Phys. Rev. Lett.* 1996, **77**, 3865-3868.
- (2). B. Delley, *J. Chem. Phys.*, 2000, **113**, 7756-7764.
- (3). W. J. Hehre, R. Ditchfield and J. A. Pople, *J. Chem. Phys.*, 1972, **56**, 2257-2261.
- (4). Gaussian 09, Revision E.01, M. J. Frisch, G. W. Trucks, H. B. Schlegel, G. E. Scuseria, M. A. Robb, J. R. Cheeseman, G. Scalmani, V. Barone, B. Mennucci, G. A. Petersson, H. Nakatsuji, M. Caricato, X. Li, H. P. Hratchian, A. F. Izmaylov, J. Bloino, G. Zheng, J. L. Sonnenberg, M. Hada, M. Ehara, K. Toyota, R. Fukuda, J. Hasegawa, M. Ishida, T. Nakajima, Y. Honda, O. Kitao, H. Nakai, T. Vreven, J. A. Montgomery, Jr., J. E. Peralta, F. Ogliaro, M. Bearpark, J. J. Heyd, E. Brothers, K. N. Kudin, V. N. Staroverov, R. Kobayashi, J. Normand, K. Raghavachari, A. Rendell, J. C. Burant, S. S. Iyengar, J. Tomasi, M. Cossi, N. Rega, J. M. Millam, M. Klene, J. E. Knox, J. B. Cross, V. Bakken, C. Adamo, J. Jaramillo, R. Gomperts, R. E. Stratmann, O. Yazyev, A. J. Austin, R. Cammi, C. Pomelli, J. W. Ochterski, R. L. Martin, K. Morokuma, V. G. Zakrzewski, G. A. Voth, P. Salvador, J. J. Dannenberg, S. Dapprich, A. D. Daniels, Ö. Farkas, J. B. Foresman, J. V. Ortiz, J. Cioslowski, and D. J. Fox, Gaussian, Inc., Wallingford CT, 2009.
- (5) H. Fei, L. Paw U, D. L. Rogow, M. R. Bresler, Y. A. Abdollahian and S. R. Oliver, *Chem. Mater.*, 2010, **22**, 2027-2032.
- (6) D. Banerjee, W. Xu, Z. Nie, L. E. Johnson, C. Coghlan, M. L. Sushko, D. Kim, M. J. Schweiger, A. A. Kruger, C. J. Doonan and P. K. Thallapally, *Inorg. Chem.*, 2016, **55**, 8241-8243.
- (7) H. Hu, B. Jiang, J. Zhang and X. Chen, *RSC. Adv.*, **2015**, *5*, 104769-104778.
- (8) C. Xiong, C. Yao and X. Wu, *Hydrometallurgy* 2008, **90**, 221-226.
- (9) D. Sheng, L. Zhu, C. Xu, C. Xiao, Y. Wang, Y. Wang, L. Chen, J. Diwu, J. Chen, Z. Chai, T. E. Albrecht-Schmitt and S. Wang, *Environ. Sci. Technol.*, 2017, **51**, 3471-3479.
- (10) J. Li, L. Zhu, C. Xiao, L. Chen, Z. Chai and S. Wang, *Radiochim. Acta.*, 2018, **106**, 581-591.
- (11) J. H. Zu, Y. Z. Wei, M. S. Ye, F. D. Tang, L. F. He and R. Q. Liu, *J. Nucl. Sci. Tech.*, 2015, **26**, 69-75.
- (12) L. Zhu, C. Xiao, X. Dai, J. Li, D. Gui, D. Sheng, L. Chen, R. Zhou, Z. Chai, T. E. Albrecht-Schmitt and S. Wang, *Environ. Sci. Technol. Lett.*, 2017, **4**, 316-322.
- (13) Y. Gao, K. Chen, X. Tan, X. Wang, A. Alsaedi, T. Hayat, C. Chen, *ACS. Sustainable Chem. Eng.*, 2017, **5**, 2163-2171.
- (14) J. Li, C. Chen, R. Zhang and X. Wang, *Sci. China Chem.*, 2016, **59**, 150-158.
- (15) X. Cui, P. Zhang, Y. Wang, Z. Lou, W. Shan, *ACS. Sustainable Chem. Eng.*, 2017, **5**, 1010-1018.
- (16) J. Zu, M. Ye, P. Wang, F. Tang and L. He, *RSC. Adv.*, 2016, **6**, 18868-18873.
- (17) Z. Shu and M. Yang, *Chin. J. Chem. Eng.*, 2010, **18**, 372-376.
- (18) M. Jia, H. Cui, W. Jin, L. Zhu, Y. Liu and J. Chen, *J. Chem. Technol. Biotechnol.*, 2013, **88**, 437-443.

- (19) L. Zhu, D. Sheng, C. Xu, X. Dai, M. A. Silver, J. Li, P. Li, Y. Wang, Y. Wang, L. Chen, C. Xiao, J. Chen, R. Zhou, C. Zhang, O. K. Farha, Z. Chai, T. E. Albrecht-Schmitt and S. Wang, *J. Am. Chem. Soc.*, 2017, **139**, 14873-14876.
- (20) D. Banerjee, S. K. Elsaidi, B. Aguila, B. Li, D. Kim, M. J. Schweiger, A. A. Kruger, C. J. Doonan, S. Ma and P. K. Thallapally, *Chem. Eur. J.*, 2016, **22**, 17581-17584.
- (21) P. Samanta, P. Chandra, S. Dutta, A. V. Desai and S. K. Ghosh, *Chem. Sci.*, 2018, **9**, 7874-7881.
- (22) J. Li, X. Dai, L. Zhu, C. Xu, D. Zhang, M. A. Silver, P. Li, L. Chen, Y. Li, D. Zuo, H. Zhang, C. Xiao, J. Chen, J. Diwu, O. K. Farha, T. E. Albrecht-Schmitt, Z. Chai and S. Wang, *Nat. Commun.* 2018, **9**, 3007.
- (23) Z. Bai, Y. Wang, Y. Li, W. Liu, L. Chen, D. Sheng, J. Diwu, Z. Chai, T. E. Albrecht-Schmitt and S. Wang, *Inorg. Chem.*, 2016, **55**, 6358-6360.
- (24) I. Langmuir, *J. Am. Chem. Soc.*, 1918, **40**, 1361-1403.
